# Supplementary material for: The pre-existing population of 5S rRNA effects p53 stabilization during ribosome biogenesis inhibition
Source: PubMed Central journal article supplement (PMC5354829; doi:10.18632/oncotarget.13833), 2016-12-09
Supplement: oncotarget-08-4257-s001.pdf [file oncotarget-08-4257-s001.pdf]

# The pre-existing population of 5S rRNA effects p53 stabilization during ribosome biogenesis inhibition

## Supplementary Materials

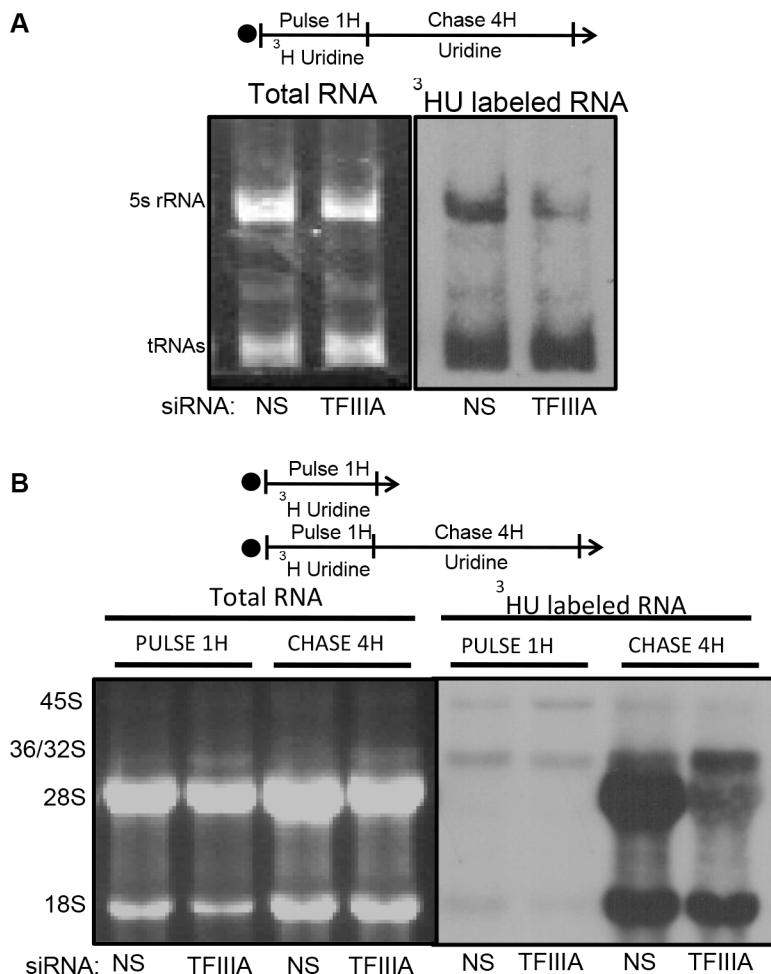

**Supplementary Figure S1: Autoradiographic analysis of  $^3$ H Uridine labeled HCT116 cells were treated with siTFIIIA or siNS, after 72 hours from the beginning of the transfection procedure. Cells were then pulse labeled for 1 hour and RNA was extracted after a chase time of 4 hours, as indicated above by the representation of the experimental design. Left panel: ethidium bromide stained total RNA; Right panel: autoradiographic exposition of  $^3$ H Uridine labeled RNA. The RNA was extracted following the above indicated experimental design to analyze (A) Neosynthesis of 5S rRNA by 10% Acrilammide TBE/UREA elettrophoresis (B) Ribosomal RNA processing by 1% Agarose gel elettrophoresis**

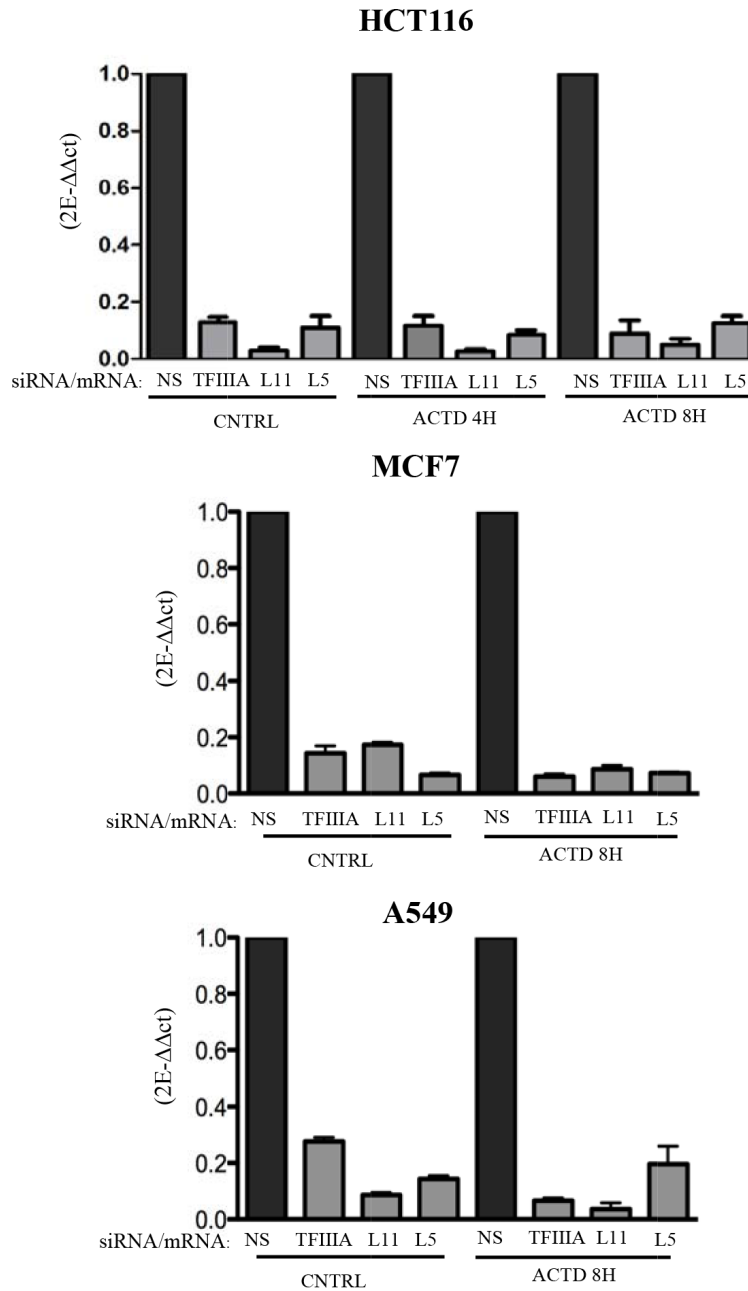

**Supplementary Figure S2: Efficiency of TFIIIA RPL11 and RPL5 silencing.** Real time qPCR analysis relative to the indicated mRNA target expression in HCT116, MCF7 and A549 cells, as indicated. Graph bars represents mean  $\pm$  SEM of three independent experiments.

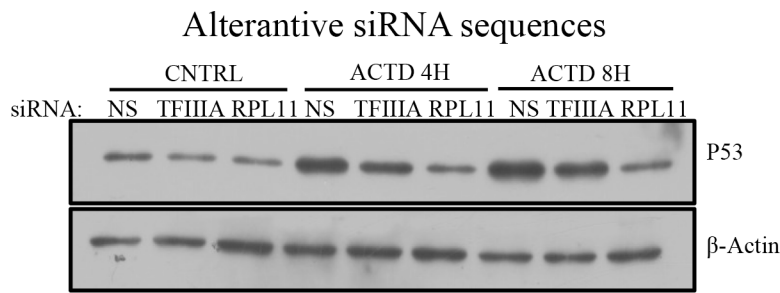

**Supplementary Figure S3: Effect of TFIIIA and RPL11 silencing on p53 stabilization (alternative siRNA sequences).** Western blot analysis of p53, and  $\beta$ -actin as loading control, in HCT116 cells, which were treated with ACTD for 4 or 8 hours at 8 nM, 72 hours from the beginning of siTFIIIA and RPL11 or siNS transfection procedure. Select stealth RNAi (Thermo scientific) were used as alternative siRNAs. (siTFIIIA: cat.HSS104587; siRPL11 cat. HSS109330; siNS cat. 12935300).

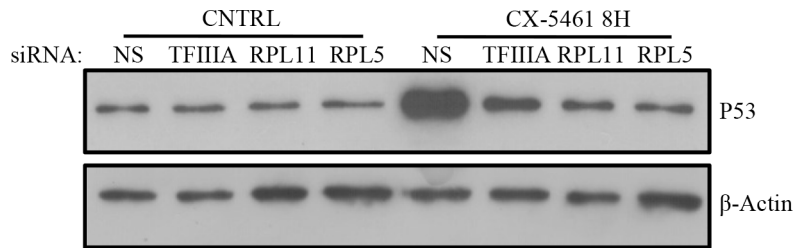

**Supplementary Figure S4: Effect TFIIIA and RPL11 silencing on p53 stabilization.** Western blot analysis of p53, and  $\beta$ -actin as loading control, in HCT116 cells, which were treated with the non-intercalating RNA Polymerase I inhibitor CX-5461 (Selleckchem, Huston, TX, USA) for 8 hours at 1 mM, 72 hours from the beginning of siTFIIIA and RPL11 or siNS transfection procedure, as indicated.

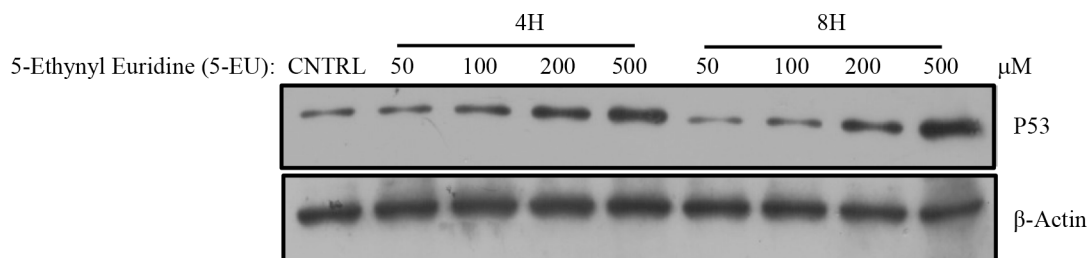

**Supplementary Figure S5: Effect of 5-Ethynyl Euridine on p53 stabilization.** Western blot analysis of p53, and  $\beta$ -actin as loading control, in HCT116 cells, which were treated with RNA labelling agent 5-Ethynyl Euridine (Thermo Scientific) for 4 or 8 hours at the indicated concentrations.

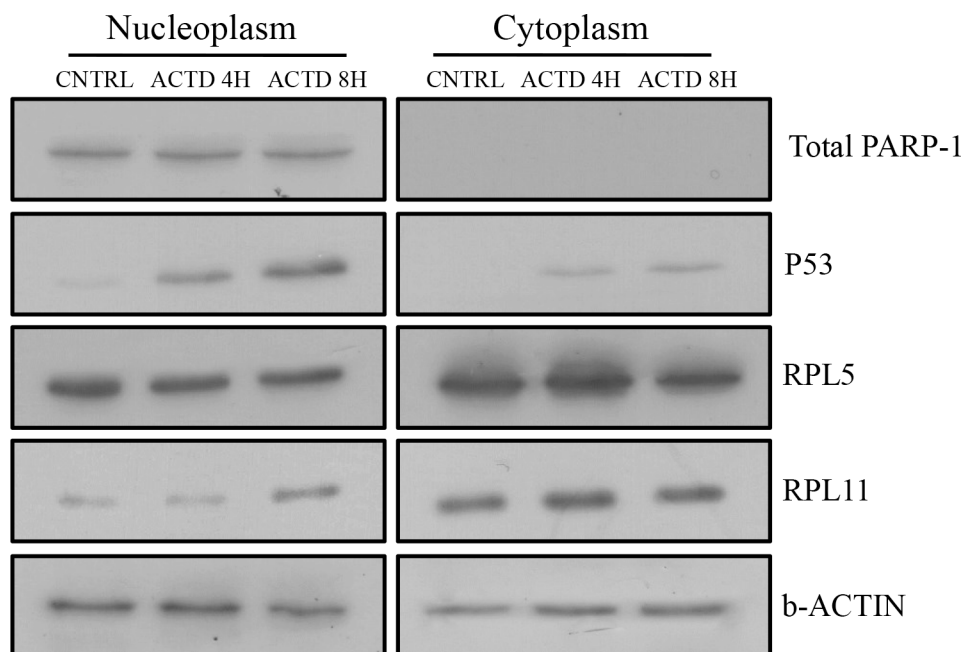

**Supplementary Figure S6: Analysis of nuclear distribution of RPL5 and RPL11 during ribosome biogenesis inhibition.** Western blot analysis of P53, RPL11 and RPL5 in nuclear or cytoplasmic extracts of HCT116 cells after progressive inhibition of ribosome biogenesis by ACTD (8 nM) treatment for 4 or 8 hours.  $\beta$ -actin was used as general loading control, while PARP-1 as a nuclear marker.

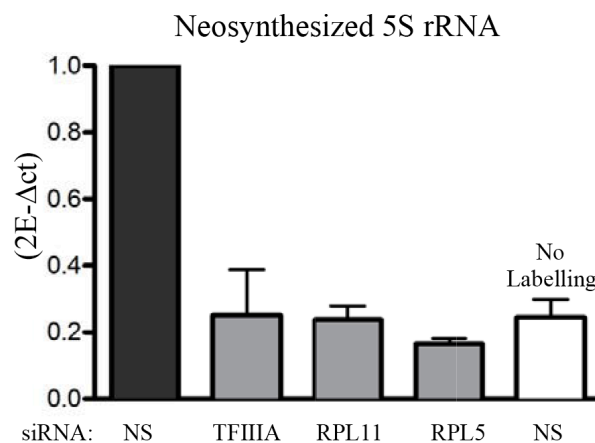

**Supplementary Figure S7: Analysis of 5S rRNA neosynthesis after TFIIIA, RPL11 and RPL5 interference Real time qPCR of neosynthesized 5S rRNA expression.** 72 hours after the beginning of TFIIIA, RPL11 and RPL5 interference HCT116 cells were labeled with 5-EU for 1 hours and chased with Uridine for 2 hours. The extracted RNA was modified with biotin azide, captured by streptavidin magnetic beads, reverse-transcribed into cDNA and 5S rRNA relative sequence was amplified by qPCR. Graph bars represents mean  $\pm$  SEM of three independent experiments.

**siRNA sequences: related to cell lines, culture conditions and siRNA transfection section**

|               |                             |
|---------------|-----------------------------|
| <b>TFIIIA</b> | 5'-CACUAGGCAUGCUGUUGUA-3'   |
| <b>RPL11</b>  | 5'-AAGGTGCGGGAGTATGAGTTA-3' |
| <b>RPL5</b>   | 5'-ACGCUUGGUGAUACAAGAUAA-3  |

**Primer sequences: related to RNA extraction, reverse transcription and Real Time qPCR section**

|                |                                                                                         |
|----------------|-----------------------------------------------------------------------------------------|
| <b>TFIIIA</b>  | <b>FOR:</b> 5'-TGAGATGAGAGGCCAAACTCCGTT-3'<br><b>REV:</b> 5'-TTGTGTGTGAACATGCTGGCTGTG-3 |
| <b>RPL11</b>   | <b>FOR:</b> 5'-TCCACTGCACAGTTTCGAGGG-3'<br><b>REV:</b> 5'-AAACCTGGCCTACCCAGCAC-3'       |
| <b>RPL5</b>    | <b>FOR:</b> 5'-GGTGTGAAGGTTGGCCTGAC-3'<br><b>REV:</b> 5'-GGCACCTGGCTGACCATCAA-3'        |
| <b>5S rRNA</b> | <b>FOR:</b> 5'-GGCCATACCACCCTGAACGC-3'<br><b>REV:</b> 5'-CAGCACCCGGTATTCCCAGG-3'        |

**Antibodies: related to whole cell protein extraction, nuclear/cytoplasmic fractionation and western blot analysis section**

|                                                    |                                                                                                  |
|----------------------------------------------------|--------------------------------------------------------------------------------------------------|
| <b><math>\alpha</math>-P53</b>                     | Clone BP53-12, Novocastra Laboratories, Newcastle Upon Tyne, UK                                  |
| <b><math>\alpha</math>-RPL11</b>                   | Clone 3A4A7, 37-3000, Thermo Fisher/Life Technologies, Waltham, MA USA                           |
| <b><math>\alpha</math>-RPL5</b>                    | Polyclonal, A303-933A, Bethyl Laboratories inc., Montgomery, TX, USA                             |
| <b><math>\alpha</math>-PARP-1</b>                  | Clone 9542, Cell Signaling Technology, Beverly, MA, USA                                          |
| <b><math>\alpha</math>-<math>\beta</math>Actin</b> | Clone AC-74, A2228, Sigma-Aldrich, Saint Louis, MO, USA                                          |
| <b><math>\alpha</math>-MDM2</b>                    | Clone SMP14 sc-965 (WB), clone H-221(IP), sc-7918, Santa Cruz Biotechnology, Santa Cruz, CA, USA |
